# Supplementary material for: The Kinetics of Formation of Microporous Polytriazine in Diphenyl Sulfone
Source: MDPI journal article supplement (doi:10.3390/molecules27113605), 2022-06-03
Supplement: s1 [file s1]

## Supporting Information

# The kinetics of formation of microporous polytriazine in diphenyl sulfone

Andrey Galukhin<sup>1,\*</sup>, Ilya Nikolaev<sup>1</sup>, Roman Nosov<sup>1</sup>, and Sergey Vyazovkin<sup>2,\*</sup>

<sup>1</sup> Alexander Butlerov Institute of Chemistry, Kazan Federal University, Kremlevskaya Str. 18, 420008 Kazan, Russia; romanosow@mail.ru (R.N.); ilkamoe1995@yandex.ru (I.N.)

<sup>2</sup> Department of Chemistry, University of Alabama at Birmingham, 901 S. 14th Street, Birmingham, AL 35294, USA

\* Correspondence: and\_galukhin@mail.ru (A.G.); vyazovkin@uab.edu (S.V.)

**Table S1.** Results of the fitting of the Kamal model to experimental data.

| Heating<br>rate / °C<br>min <sup>-1</sup> | $E_1/\text{kJ mol}^{-1}$ | $E_2/\text{kJ mol}^{-1}$ | $A_1/\text{s}^{-1}$           | $A_2/\text{s}^{-1}$              | $m$   | $n$         | $R^2$ |
|-------------------------------------------|--------------------------|--------------------------|-------------------------------|----------------------------------|-------|-------------|-------|
| 2                                         | 70*                      | 145*                     | $(1.03 \pm 0.02) \times 10^3$ | $(3.15 \pm 0.05) \times 10^{10}$ | 0.53* | 1.00 ± 0.01 | 0.99  |
| 4                                         |                          |                          | $(0.86 \pm 0.02) \times 10^3$ | $(2.56 \pm 0.02) \times 10^{10}$ |       | 1.09 ± 0.01 | 0.99  |
| 6                                         |                          |                          | $(0.60 \pm 0.02) \times 10^3$ | $(1.88 \pm 0.02) \times 10^{10}$ |       | 0.95 ± 0.01 | 0.99  |
| 8                                         |                          |                          | $(1.00 \pm 0.03) \times 10^3$ | $(1.60 \pm 0.02) \times 10^{10}$ |       | 0.84 ± 0.01 | 0.99  |

\*denotes values fixed during the fittings.
